# Supplementary material for: Conformational disorder and solvation properties of the key-residues of a protein in water–ethanol mixed solutions
Source: Royal Society of Chemistry journal article supplement (doi:10.1039/c7cp06022j), 2017-01-01
Supplement: c7cp06022j1.pdf [file c7cp06022j1.pdf]

## Supporting Information (SI)

### Conformational disorder and solvation properties of the key-residues of a protein in water-ethanol mixed solutions

Dayanidhi Mohanta, Santanu Santra and Madhurima Jana\*  
Molecular Simulation Laboratory, Department of Chemistry,  
National Institute of Technology, Rourkela - 769008, India

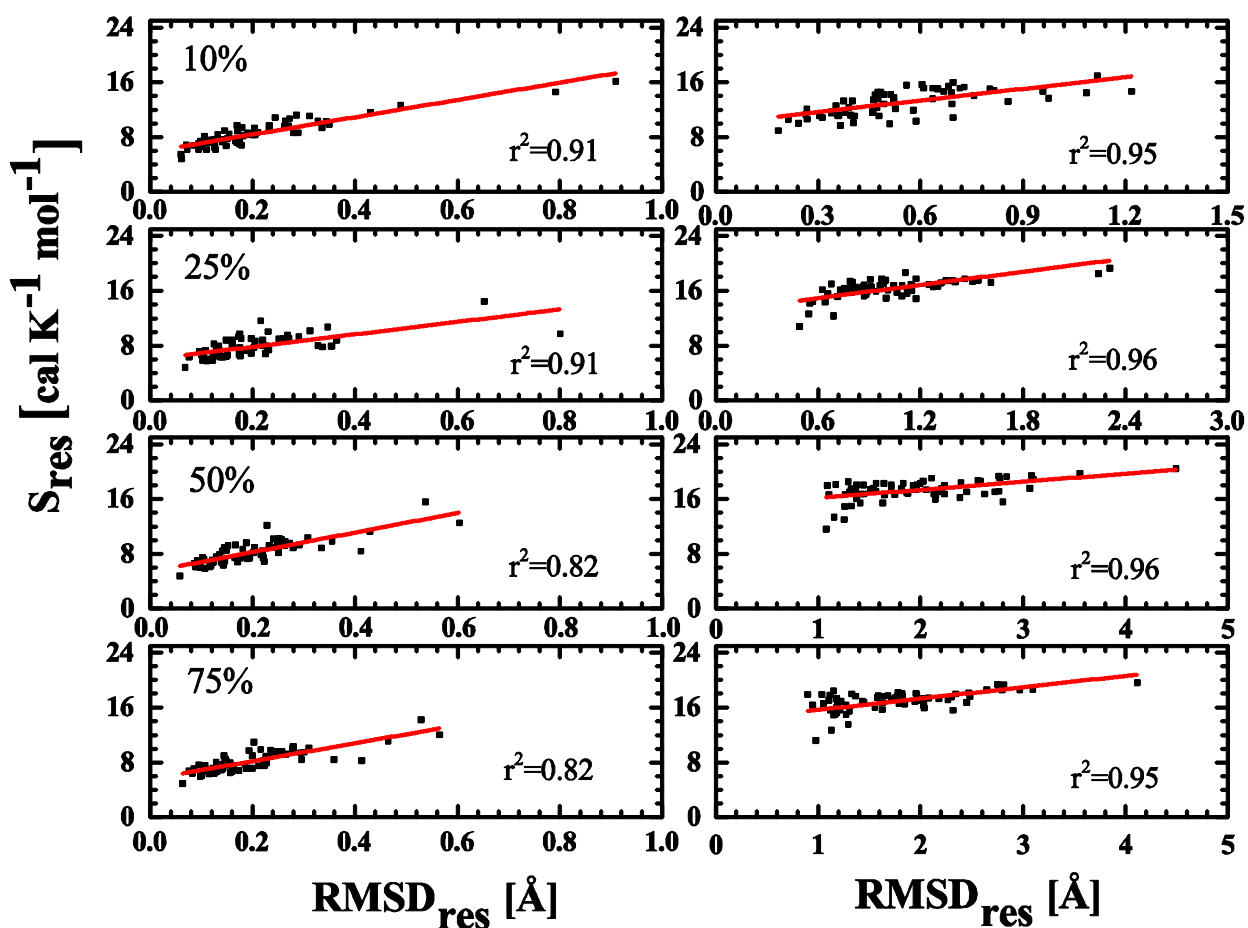

**Figure S1:** Configurational entropy,  $S_{res}$  as a function of RMSD,  $RMSD_{res}$  of the protein in its folded (S1, left panel) and unfolded (S2, right panel) states at different ethanol concentrations. The linear fit with regression coefficient ( $r^2$ ) values is shown.

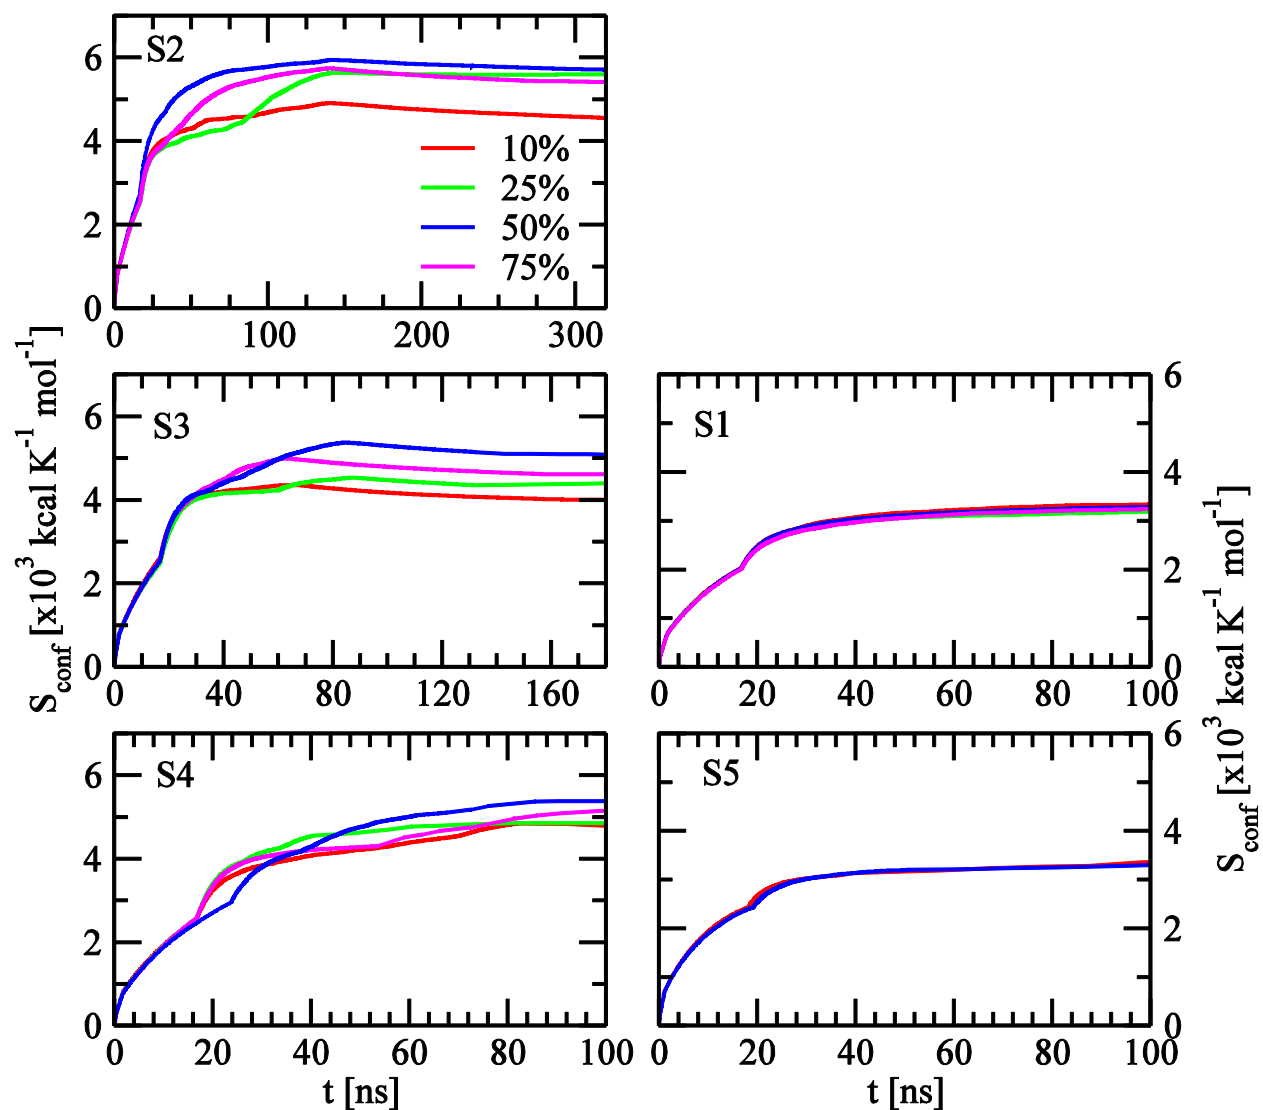

**Figure S2:** Cumulative configurational entropy of the whole protein as obtained from the S3, S4 and S5 simulations. The corresponding plot as obtained from S2 and S1 simulations are also shown for comparison.
